# Supplementary material for: Comet-FISH with strand-specific probes reveals transcription-coupled repair of 8-oxoGuanine in human cells
Source: PubMed Central journal article supplement — Nucleic Acids Res. 2013 Jun 17;41(16):7700–12. doi: 10.1093/nar/gkt524 (PMC3763531; doi:10.1093/nar/gkt524), 2013-06-17
Supplement: supp_gkt524_nar-02554-d-2012-File008.pdf [file supp_gkt524_nar-02554-d-2012-File008.pdf]

Supplementary Table 1. Sequences of primers used in PCR.

|    | Forward Primers                      | Reverse Primers                |
|----|--------------------------------------|--------------------------------|
| 1  | 5'-Biotin-GGGAAGTCAGAAGAACCACCAGTGA  | 5'-CCTAGCTACTGGGGAGACTGAGGTA   |
| 2  | 5'-Biotin-AGAGCACTACCACGCCTGGCCAA    | 5'-ACTGTACTCCAGCCTGGGCAACAGA   |
| 3  | 5'-Biotin-CCTCCTACTTATCAGCTCCAAAGCA  | 5'-CTCTTGTAGTCCCAGCTACTCAGGA   |
| 4  | 5'-Biotin-GAGGAGTGACTTTGGTTCTCTGCAA  | 5'-CCATTCCTATGACTTCAGCAGCTGA   |
| 5  | 5'-Biotin-TGGAATCATACGGCTGGAATTGGAA  | 5'-CTGAGTTTGCAGAGAACCAAAGTCA   |
| 6  | 5'-Biotin-ATACAGTTTGTAAGTGGCTGAACCA  | 5'-TTTCCTACTTCTACGAGCCTCTGA    |
| 7  | 5'-Biotin-TCTTTTCGTTTGAACCTTGAGTGGA  | 5'-GCCAATCAAAAAAGGGCTAGAGGA    |
| 8  | 5'-Biotin-CTAGCCCTTTTTTTGATTGGCACCA  | 5'-CTAGCCCTTTTTTTGATTGGCACCA   |
| 9  | 5'-Biotin-AGTACAGTGGCTCGATCTTGGCTCA  | 5'-TAATCCCAGCACTTTGGGAGGCCAA   |
| 10 | 5'-Biotin-AAAAGAAGAGAGCTACTCAGTGGAA  | 5'-AGCTGATAAGTAGGAGGTTATCAGA   |
| 11 | 5'-Biotin-TCCTGCGCATCCTCTTTTTGTGTCA  | 5'-CACAAAGACAGTAGAGAGCGGCCACA  |
| 12 | 5'-Biotin-GCTTGGTGTACGAATGATCCTGTCA  | 5'-GCTCTCTTCTTTTGGGGGCTTCTGA   |
| 13 | 5'-Biotin-GCCAGATATGACTTCATGAGGGTA   | 5'-TGACTTTTTTTTTCCCCTATGGTGTGA |
| 14 | 5'-Biotin-CCTACCTCAGTCTCCCAGTAGCTA   | 5'-CAGTAAGAGCTGACTACCGGGGCTA   |
| 15 | 5'-Biotin-TAGGTAGCTGCGTGGCTAACGGAGA  | 5'-GCATGAGATTGGCGGTCTGGGGAGA   |
| 16 | 5'-Biotin-TGATCCTCCACCTTGGCCTCCCAA   | 5'-GAGGCACATTCTGGTCAAAGGCACA   |
| 17 | 5'-Biotin-TTACAGACAGTGATGTGTGTTCTGA  | 5'-TCGAATCAGGCGCTTAAATTTCTCA   |
| 18 | 5'-Biotin-CGCTAAGTCGCTGGCCATTGGTGGA  | 5'-CGCTTCCGTTCAAACCCTGCGTGA    |
| 19 | 5'-Biotin-CCCCGGTAGTCAGCTCTTACTGAGA  | 5'-GGAAAGTCCTTCTCCTATCCATCCA   |
| 20 | 5'-Biotin-TATTTTGTGGGTTTTTCAGCTGCTGA | 5'-CTACCTCTATGAGTCCCTTTAAGGA   |
| 21 | 5'-Biotin-GACTCAAGAGGGCTTTAAACTGAGA  | 5'-TCTTCTGACTTCCCCCATCCCCCAA   |
| 22 | 5'-Biotin-GCAGGCTTAATTTATTGGCTGGCAA  | 5'-CAAGGCCTAACTCCTACAAGACCAA   |
| 23 | 5'-Biotin-GGCCAGGCTAGTCTCAAACCTCCTGA | 5'-AAGTGTGGTTCTGACAGCCAAGGA    |
| 24 | 5'-Biotin-GCCACGATCATGCTATTGCACTCCA  | 5'-AGGTAGCTAGGACTACAGGCAAGCA   |
| 25 | 5'-Biotin-AGTCTCTGTAAGTAGGCTGGGCACA  | 5'-TGGGCTCAAGCAATCTTCCCTCCCTA  |
| 26 | 5'-Biotin-TAATCCCAGCACTTTGGGAGGCCAA  | 5'-AGTGTAGTGGCGTAATCTCAGCTCA   |
| 27 | 5'-Biotin-CTAGGACTACAGAAGTGCATCACCA  | 5'-TAGAGAGGGCATCCAAGACTGGGTA   |
| 28 | 5'-Biotin-GTCTCGAACTCCTGACCTCAAGTGA  | 5'-CCACTGTGCCAGCCTACTTACAGA    |
| 29 | 5'-Biotin-GCTGAGATTGTGCCATTGCACTCCA  | 5'-CCACACGAACTCGCATCTCAGAGGA   |
| 30 | 5'-Biotin-GCGACAGAGCGAGACTGTCA       | 5'-TCAGAGGAGAGTAGCATAAAACCTA   |
| 31 | 5'-Biotin-AGTGTGGGCCTCTACTTACAGGGAA  | 5'-AGCCAGACATGGTGGCCCATGCCTA   |
| 32 | 5'-Biotin-GCAGAGACAAAGGAAAACCTACACCA | 5'-AAAAGGTTTGTTCCTGCAAGGCAA    |
| 33 | 5'-Biotin-GTTCACAAGACTTACAGATTAGAGGA | 5'-CCTGTTTGCCACTCCTGTCCAGCAA   |
| 34 | 5'-Biotin-TTCGTTGTAACACCACTGCACTCA   | 5'-CAGGAGGATCACTTAGGAACAGAGA   |
| 35 | 5'-Biotin-GGCTTAACAGATTACTGTGCGGTGA  | 5'-CGAATTGATCACAAACCAGTTACAGA  |
| 36 | 5'-Biotin-GTGATCTGCCTGCCTCTGCCTTCCA  | 5'-TTACTTGGGAAGCTGAGGCGGGAGA   |
| 37 | 5'-Biotin-GTTGTCCTTCAAGTGTATGACAGA   | 5'-GAATGCTGGGTGCATATTTGACCTA   |
| 38 | 5'-Biotin-CTTGATGCCCTCTCTACGTCCCTA   | 5'-GCCATGTTGGTCAGGCTGGTCTCGA   |
| 39 | 5'-Biotin-ACGAAAAGATTGGAGGGTTGATGGA  | 5'-GGCAACAAAGCAAGACTCTGTCTCA   |

|    |                                      |                               |
|----|--------------------------------------|-------------------------------|
| 40 | 5'-Biotin-TAGTCTCAGCACTTTGGGAGGCCAA  | 5'-AGTGGCATGATCACACCCAACAGCA  |
| 41 | 5'-Biotin-TGGGATCATTTTTTGGTCTAACACCA | 5'-GTAATTCTCCCACCTCAGCCTCCAA  |
| 42 | 5'-Biotin-GAATTACTTGAACCCAGGAGGTGGA  | 5'-AAGACAGAGGTGACCACATGGCCTA  |
| 43 | 5'-Biotin-CATCATAGGAAAACCCTAATCCAGA  | 5'-TGAAAACCTGGCATGACTACACACA  |
| 44 | 5'-Biotin-ATGCACAGGGTACTAGAAAAAAGGA  | 5'-TTGCCATAACTATGAGCAGAACACA  |
| 45 | 5'-Biotin-TCATATTCCCAGGGCTGTTGCTGCA  | 5'-ACCCCTGCCATAAAGGTGGGACACA  |
| 46 | 5'-Biotin-AGGAAGAATTGGGCCCTACAAAGCA  | 5'-TGCACACTTCATGTTTCTTGGAGGA  |
| 47 | 5'-Biotin-TCCCACCTTTATGGCAGGGGTGGAA  | 5'-GGTGACAGAGCAAGACTCTGTCTCA  |
| 48 | 5'-Biotin-CTCAAGATTCCAAACGCAGCACCAA  | 5'-TAGATTGGGATGTGGAACTGGAGA   |
| 49 | 5'-Biotin-CCCTCCCCATCAACTACCATGTGA   | 5'-TGCATTCAGAGTAGGGTGAAGCTCA  |
| 50 | 5'-Biotin-ACCGTGTTAGCCAGGATGGTCTCGA  | 5'-AGCCCTTCCCTTCCAACAGAACACA  |
| 51 | 5'-Biotin-GACAAGCTACATGTAATCAAGCTCA  | 5'-GCATTCCAGTATTACAAGGTTGGAA  |
| 52 | 5'-Biotin-ACTGCTGGAGAAATCAGAATTTGGA  | 5'-TAATCTGGACACAACCTGTTCAAGCA |
| 53 | 5'-Biotin-ATGCAAACGAAATCTCAGGTGAGCA  | 5'-ACACTGAGCACAGTGCCTTCTTCCA  |
| 54 | 5'-Biotin-GCAGTTAGCTGTTCTGAACTGCCAA  | 5'-AGTTCTAAATCTGGGTGGATCCAGA  |
| 55 | 5'-Biotin-CCCAGGATGGAAGCTTGGGTGTGA   | 5'-AAAGCAGAGATGTTCTTAAAGACCA  |
| 56 | 5'-Biotin-ACAGTTGTGTCCAGATTAAGGGAGA  | 5'-ACTATTCTAGTCTTTACGCTGTCCA  |
| 57 | 5'-Biotin-GCTGCGGAGATTAACAAATGGGTGA  | 5'-GAACAGTTCTCCAGAAGTCAAACCA  |
| 58 | 5'-Biotin-AAAAAGTTTTTGGCAAGCTGGA     | 5'-TCTCCAAATTCTGATTTCTCCAGCA  |
| 59 | 5'-Biotin-ACATACAGATCACAAGCCTAGGAGA  | 5'-CCTTGGCAGTTTTCTATCTTAGTCA  |
| 60 | 5'-Biotin-CAGCATTCTCTGTGTTCTGTTGGA   | 5'-CGCAGCTGGGATGAACATTTTCCTA  |
| 61 | 5'-Biotin-AGGAGTTCGAGACCAGCCTGGCCAA  | 5'-TTTCGCTCTTGTCAACCAGGCTGGA  |
| 62 | 5'-Biotin-TCCCCTCATTTTTTCTGAGACAGA   | 5'-GAGACCATCCTGGCTAACACGGTGA  |
| 63 | 5'-Biotin-AAAGCCCTGAAATCTTCATGGGTGA  | 5'-ATACTTGAACAGAACAGGAGCCTCA  |
| 64 | 5'-Biotin-CATCTGAGGTACCAGTTCATCTCA   | 5'-TTTTAAGCCGGTCCAAAAAGCGCAA  |
| 65 | 5'-Biotin-CCTTTGCCATTGTAAGGACTTTGGA  | 5'-AGTGAGATGAACCTGGTACCTCAGA  |
| 66 | 5'-Biotin-TCACACGGCAGGGTACTCCAACAGA  | 5'-TGAGGAACTGCGTTCCTTTGGAGGA  |
| 67 | 5'-Biotin-CGGCTTAAAAAACGGCGCACACGA   | 5'-TCTCCTTGAGCTGTGGTGGGTTCCA  |
| 68 | 5'-Biotin-AACATTCCATGCTCATGGGTAGGAA  | 5'-GAAGTCAGGTAGTGTGATGCCTCCA  |
| 69 | 5'-Biotin-TACCCTCAAAGGGAAGCCCATCAGA  | 5'-TTTTAGGGTAGGCCCTGGTGGTGACA |
| 70 | 5'-Biotin-CAGAAATGTACAAGTTAGCCCCACA  | 5'-ACTTCAAACCAAGGGCTTGTGTCA   |
| 71 | 5'-Biotin-TTCAGCTTTAGGAGGGTGCTTCTCA  | 5'-AGGCCAGGAGAGACAAATACACTGA  |
| 72 | 5'-Biotin-GCTAGATGACGAGTTAGTGGGTGCA  | 5'-AATTCGGACAGATTTACGGAGGGAA  |
| 73 | 5'-Biotin-AAGAGCTATCTATGACAAACCCAGA  | 5'-ATCATGTATCTGCAAACAGGGACA   |
| 74 | 5'-Biotin-ACGAGAACAAGACACAACGTACCA   | 5'-TCTATTTCTTTCAGTTCCTGCTCTGA |
| 75 | 5'-Biotin-CAACAGGTGCTGGAGAGGATGTGGA  | 5'-ATGCCGCAATAAACATACGTGTGCA  |
| 76 | 5'-Biotin-ATAATGACAGGATCAAACCTCCACA  | 5'-AACCCCTGCCTTTTTTTGTTTTCCA  |
| 77 | 5'-Biotin-GGGAGACTTTAACACCCCACTGTCA  | 5'-TTTGCTGAGGAGAGCTTTACTTCCA  |
| 78 | 5'-Biotin-GCTCGAGAACTATGTGAAGAATGCA  | 5'-CCATTCTCCCCATCACTTTCAGGTA  |
| 79 | 5'-Biotin-AACAGGCAACCTACAAAATGGGAGA  | 5'-CTCTGATGGCCAGTGATGATGAGCA  |
| 80 | 5'-Biotin-GAGGAACTGGTACCATTCTTCTGA   | 5'-ATAAGCTTTTGGATGTGCTGCTGGA  |
| 81 | 5'-Biotin-CACAAATAGCAAAGACTTGAACCAA  | 5'-GTTCAATTTCCCACCTATGAGTGAGA |
| 82 | 5'-Biotin-CCAAAACAACATGGTACTGGTACCA  | 5'-GTATCAGGTGTAAGGAAGGGATCCA  |

|    |                                     |                               |
|----|-------------------------------------|-------------------------------|
| 83 | 5'-Biotin-CAACAAAATTGATAGACCGCTAGCA | 5'-TTCTTCCTGGTTTAGTCTTGGGAGA  |
| 84 | 5'-Biotin-CCAGGAGAACTTCCCAATCTAGCA  | 5'-GCCGAGAGATCTGCTGTTAGTCTGA  |
| 85 | 5'-Biotin-ATATCTAGAAAACCCACTGTCTCA  | 5'-TCCTTCACATCCCTTGTAAGTTGGA  |
| 86 | 5'-Biotin-AACTATCTCTCAGACCACAGTGACA | 5'-CACACTGCTTTGAATGTGTCCAGAGA |
| 87 | 5'-Biotin-AAACAAAAAAGGCAGGGGTTGCAA  | 5'-TCTAAGTCTCTTTGTAGGTCACTCA  |
| 88 | 5'-Biotin-TGGCTAGCCATATGGAGAAAGCTGA | 5'-TTGCCATTGCTTTTGGTGTTTTGGA  |

Supplementary Table 2. Labeling numbers of strand-specific FISH probes.

|                               | Probes for the 3' region of ATM TS | Probes for the 3' region of ATM NTS | Probes for the 5' region of ATM TS | Probes for the 5' region of ATM NTS |
|-------------------------------|------------------------------------|-------------------------------------|------------------------------------|-------------------------------------|
| Labeling number per 100 bases | 6.1                                | 6.2                                 | 6.0                                | 5.4                                 |

Supplementary Table 3. Percentage of DNA in comet tails from cells irradiated with 0.1 J/m<sup>2</sup> UV light, and not digested with T4 endonuclease V.

| Cell types         | Wild type | CSB | XPC | $\alpha$ -Amanitin treated XPC |
|--------------------|-----------|-----|-----|--------------------------------|
| Average            | 0.7       | 0.8 | 1.3 | 1.0                            |
| Standard deviation | 0.7       | 0.9 | 1.1 | 1.0                            |

Supplementary Table 4. Percentage of DNA in comet tails from cells treated with KBrO<sub>3</sub> and not digested with hOGG1.

| Cell types         | Wild type | CS-B   | UV <sup>S</sup> -A | $\alpha$ -Amanitin treated wild type | hOGG1 KD | XP-A   |
|--------------------|-----------|--------|--------------------|--------------------------------------|----------|--------|
| KBrO <sub>3</sub>  | 60 min    | 60 min | 60 min             | 60 min                               | 40 min   | 60 min |
| hOGG1              | -         | -      | -                  | -                                    | -        | -      |
| Repair time (min)  | 30        | 30     | 30                 | 30                                   | 30       | 30     |
| Average            | 1.5       | 1.1    | 1.2                | 2.2                                  | 8.7      | 9.5    |
| Standard deviation | 1.1       | 1.3    | 1.3                | 2.1                                  | 2.7      | 3.3    |

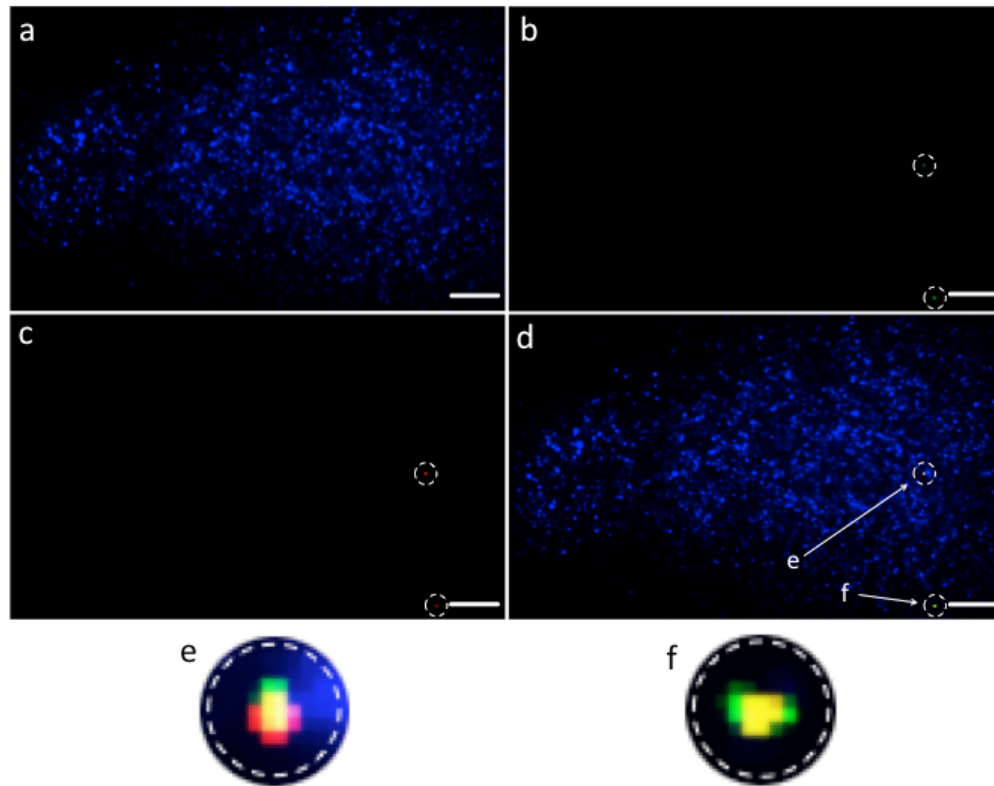

Supplementary Figure 1. Representative comet-FISH images of a UV-damaged cell with two intact ATM strands showing (a) the bulk DNA stained with DAPI, (b) Alexa 488 labeled probes targeting the 3' regions of the ATM strands, (c) Alexa 594 labeled probes targeting the 5' regions of the ATM strands, (d) an overlay of Supplementary Figure 1a, b and c (scale bars, 5  $\mu$ m), (e) and (f) enlargements of the probes signals from Supplementary Figure 1d.

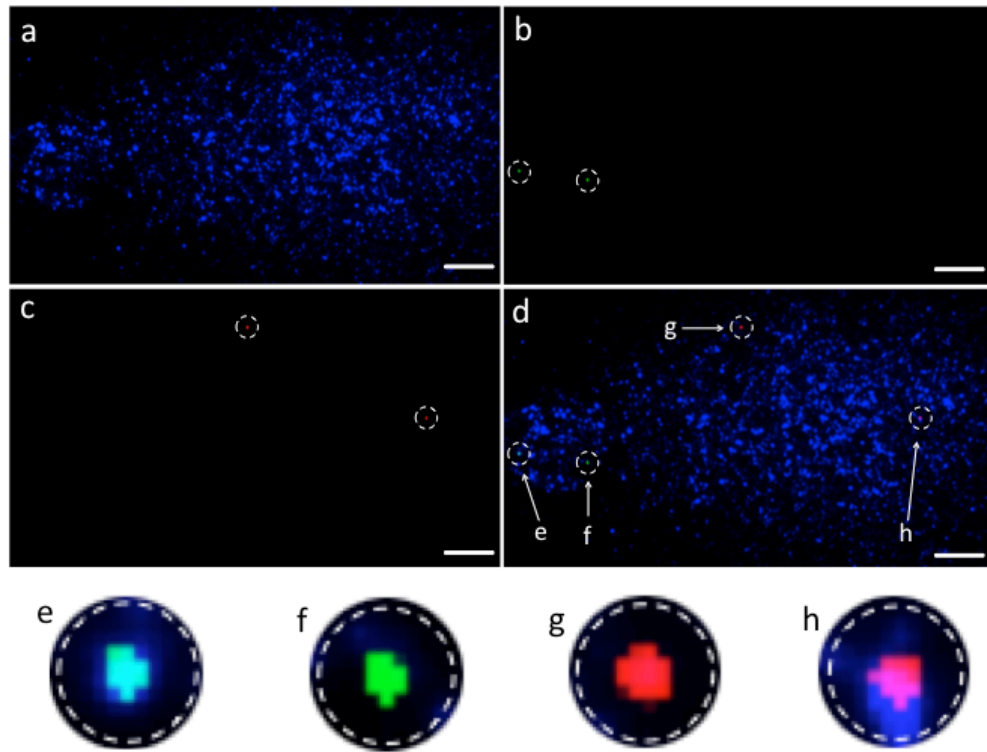

Supplementary Figure 2. Representative comet-FISH images of a UV-damaged cell with two damaged ATM strands showing (a) the bulk DNA stained with DAPI, (b) Alexa 488 labeled probes targeting the 3' regions of the ATM strands, (c) Alexa 594 labeled probes targeting the 5' regions of the ATM strands, (d) an overlay of Supplementary Figure 2a, b and c (scale bars, 5  $\mu\text{m}$ ), (e) (f) (g) and (h) enlargements of the probes signals from Supplementary Figure 2d.
